# An integrated population model for estimating the relative effects of natural and anthropogenic factors on a threatened population of Pacific trout

Mark D. Scheuerell<sup>1,5</sup>, Casey P. Ruff<sup>2</sup>, Joseph H. Anderson<sup>3</sup>, Eric M. Beamer<sup>4</sup>

<sup>1</sup>*Fish Ecology Division, Northwest Fisheries Science Center, National Marine Fisheries Service, National Oceanic and Atmospheric Administration, Seattle, WA USA, mark.scheuerell@noaa.gov*

<sup>2</sup>*Skagit River System Cooperative, La Conner, WA USA, cruff@skagitcoop.org*

<sup>3</sup>*Washington Department of Fish and Wildlife, Olympia, WA USA, joseph.anderson@dfw.wa.gov*

<sup>4</sup>*Skagit River System Cooperative, La Conner, WA USA, ebeamer@skagitcoop.org*

<sup>5</sup>**Present address:** *U.S. Geological Survey Washington Cooperative Fish and Wildlife Research Unit, School of Aquatic and Fishery Sciences, University of Washington, Seattle, WA USA, scheuerl@uw.edu*

**Running title:** Density dependent populations dynamics

**Key words:** density dependence, population dynamics, missing data, state-space, Bayesian, hierarchical, hatchery, *Oncorhynchus*

**Number of words:** 6971 (total); 310 (summary); 4670 (main text); 79 (acknowledgements); 1617 (references), 0 (tables); 295 (figure legends)

**Number of tables:** 0

**Number of figures:** 6

**Number of references:** 58

**Corresponding author:**

Mark D. Scheuerell  
U.S. Geological Survey Washington Cooperative Fish and Wildlife Research Unit  
School of Aquatic and Fishery Sciences  
Box 355020  
University of Washington  
Seattle, Washington 98195 USA  
Telephone: 206.543.5997  
Email: scheuerl@uw.edu

## 1 **Summary**

2 **1.** Assessing the degree to which at-risk species are regulated by density dependent versus  
3 density independent factors is often complicated by incomplete or biased information. If not  
4 addressed in an appropriate manner, errors in the data can affect estimates of population  
5 demographics, which may obfuscate the anticipated response of the population to a specific  
6 action.

7 **2.** We developed a Bayesian integrated population model that accounts explicitly for interannual  
8 variability in the number of reproducing adults and their age structure, harvest, and  
9 environmental conditions. We apply the model to 41 years of data for a population of threatened  
10 steelhead trout *Oncorhynchus mykiss* using freshwater flows, ocean indices, and releases of  
11 hatchery-born conspecifics as covariates.

12 **3.** We found compelling evidence that the population is under strong density dependence, despite  
13 being well below its historical population size. In the freshwater portion of the lifecycle, we  
14 found a negative relationship between productivity (offspring per parent) and peak winter flows,  
15 and a positive relationship with summer flows. We also found a negative relationship between  
16 productivity and releases of hatchery conspecifics. In the marine portion of the lifecycle, we  
17 found a positive correlation between productivity and the North Pacific Gyre Oscillation.  
18 Furthermore, harvest rates on wild fish have been sufficiently low to ensure very little risk of  
19 overfishing.

20 **4. *Synthesis and applications.*** The evidence for density dependent population regulation,  
21 combined with the substantial loss of juvenile rearing habitat in this river basin, suggests that  
22 habitat restoration could benefit this population of at-risk steelhead. Our results also imply that  
23 hatchery programs for steelhead need to be considered carefully with respect to habitat

24 availability and recovery goals for wild steelhead. If releases of hatchery steelhead have indeed  
25 limited the production potential of wild steelhead, there are likely significant tradeoffs between  
26 providing harvest opportunities via hatchery steelhead production, and achieving wild steelhead  
27 recovery goals.

## 28 Introduction

29 Managing at-risk species requires an understanding of the degree to which population  
30 dynamics are self-regulated versus driven by external factors. However, the data used to identify  
31 potentially important density-dependent and population-environment relationships are rarely, if  
32 ever, fully comprehensive or error free. Rather, imperfect detection, misidentification, and non-  
33 exhaustive sampling all lead to a somewhat distorted view of the true state of nature. For  
34 example, when not addressed in an appropriate manner, errors in population censuses may cause  
35 underestimates of recruitment (Sanz-Aguilar *et al.* 2016) or overestimates of the strength of  
36 density dependence (Knappe & de Valpine 2012). Similarly, imprecision in the estimated age  
37 composition of the population also biases the estimated strength of density dependence (Zabel &  
38 Levin 2002). In a conservation context, these erroneous conclusions may directly influence the  
39 anticipated response of a population to a specific action. Therefore, proper consideration of all  
40 sources of uncertainty in the data is necessary to design robust management strategies aimed at  
41 protecting at-risk species.

42 The productivity and carrying capacity of a population may also vary over time and space  
43 (Thorson *et al.* 2015), and explicit consideration of external drivers can improve estimates of  
44 population dynamics under density dependent conditions (Lebreton & Gimenez 2013). For at-  
45 risk species, these exogenous factors can be used to better understand drivers of historical  
46 population demographics and help identify possible recovery options. Incorporating covariates  
47 into population models can also improve forecasts of future dynamics, especially over shorter  
48 time horizons most relevant to natural resource management (Ward *et al.* 2014). Furthermore,  
49 accelerated global change will likely create synergistic effects that complicate efforts to make  
50 reliable long-term predictions (Schindler & Hilborn 2015). Thus, any reasonable assumptions



51 about future responses of populations should begin with an attempt to fully account for the  
52 uncertainty in population-environment relationships based on all of the available information.

53 Many populations of Pacific salmon (*Oncorhynchus* spp.) throughout the northwestern  
54 United States have declined markedly since the early 1900s due to a variety of causes such as  
55 habitat alteration, hydropower development, and overharvest (Ruckelshaus *et al.* 2002). For  
56 conservation purposes, Pacific salmon species are grouped into evolutionarily significant units  
57 (ESU, Waples 1991); 28 of the 49 extant ESUs of Pacific salmon are currently listed as  
58 “threatened” or “endangered” under the U.S. Endangered Species Act. As a result, a number of  
59 life-cycle models have been developed to evaluate the possible future benefits of conservation  
60 actions such as habitat restoration (e.g., Scheuerell *et al.* 2006) and the potentially negative  
61 consequences of climate change (e.g., Zabel *et al.* 2006). However, these models were assembled  
62 by first obtaining parameter values from the literature, or estimating them from disparate data  
63 sources, and then putting all of the pieces together post hoc. Consequently, they do not reflect a  
64 comprehensive assessment of the total uncertainty in population demographics.

65 More recently however, researchers have turned toward integrated population models  
66 (IPMs) as a means to convey the combined uncertainty in all of the data sources, which is  
67 particularly important in a conservation context (Buhle *et al.* 2018; Zipkin & Saunders 2018).  
68 IPMs are similar to state-space models in that they have specific sub-models for 1) describing the  
69 stochastic and unobservable population dynamics; and 2) addressing the noisy, incomplete data  
70 (Schaub & Abadi 2011; Maunder & Punt 2013; Yen *et al.* 2019). Although IPMs have been  
71 widely developed and applied to mammals (e.g., Eacker *et al.* 2017; Regehr *et al.* 2018) and  
72 birds (e.g., Crawford *et al.* 2018; Saunders, Cuthbert & Zipkin 2018), there are very few  
73 examples for Pacific salmon (cf., Buhle *et al.* 2018).

74           Here we combine incomplete data on adult abundance, age composition, and harvest into  
75 a Bayesian IPM to answer important questions relevant to management of a threatened  
76 population of anadromous steelhead trout *Oncorhynchus mykiss* Walbaum 1792 from the Skagit  
77 River basin, which drains ~6900 km<sup>2</sup> in southwestern Canada and northwestern United States.  
78 Specifically, we used 39 years of age structured abundance data (1978-2018) to quantify the  
79 degree of density dependence and the effects of a specific suite of environmental drivers on  
80 intrinsic productivity within the Skagit River steelhead population. We found that although  
81 recent population censuses are well below historical estimates, the population still operates under  
82 relatively strong density dependence. We also found that streamflow during winter and releases  
83 of hatchery-reared juvenile steelhead were negatively related to wild steelhead survival, but that  
84 survival was positively related to streamflow during summers as juveniles and sea-surface  
85 temperatures experienced as adults in the North Pacific. In light of remaining uncertainty in the  
86 factors governing the population dynamics of Skagit River steelhead, this modelling framework  
87 is an effective tool for setting near term recovery goals and evaluating population level response  
88 recovery actions.

## 89 **Materials and methods**

### 90 STUDY SPECIES AND DATA

91           The Skagit River system is predominantly a glacially fed system that consists of a  
92 combination of rain, snow-transitional, and snow-dominated tributaries providing approximately  
93 48 km<sup>2</sup> of potential habitat suitable for spawning and rearing by wild winter run steelhead (Hard  
94 *et al.* 2015). Adult steelhead trout in the Skagit River generally enter freshwater in November  
95 through April and typically spawn in March through June. The majority of juveniles rear in  
96 freshwater for 2 years prior to migrating to sea as smolts where they spend 2 to 6 years feeding

97 and growing before returning to freshwater as sexually mature adults to initiate spawning (i.e.,  
98 they reach sexual maturity at age three through eight; ~82% mature at age four or five). Scale  
99 samples taken from wild steelhead indicate that, on average, 9% of returning adults are repeat  
100 spawners. These fish then spend a year at sea before returning again to freshwater to spawn  
101 again.

102         Due to a combination of logistical constraints, only a fraction of the known spawning  
103 area was surveyed for wild spawners. Specifically, standardized index reach surveys were  
104 conducted annually in only 2 of 5 major sub-basins and 13 of 63 tributaries known to support  
105 wild steelhead production. A basin-wide estimate of wild spawners was generated annually by  
106 expanding each survey to account for estimated available habitat not surveyed. Fisheries  
107 biologists in the Skagit basin generally consider the escapement estimates to be conservative: it  
108 is more likely that escapement is underestimated than overestimated because unobserved  
109 spawning sites would serve to increase abundance. Our analyses begin with surveys in 1978 and  
110 continue through 2018.

111         In the model described below, we evaluate several environmental indicators of survival.  
112 Specifically, flow conditions experienced by juveniles during freshwater rearing can have strong  
113 effects on their survival to adulthood via the following mechanisms: (1) spatial contraction of  
114 habitat as a result of low summer flows and high water temperatures that coincide with the  
115 period of highest metabolic demand (e.g., Crozier *et al.* 2010), and (2) habitat displacement or  
116 direct mortality resulting from peak winter flows (e.g., Irvine 1986). Therefore, we utilized long-  
117 term flow records from a gage (#12178100) located in Newhalem Creek, a snowmelt dominated  
118 stream located in the Upper Skagit River (48.66 N, 121.246 W), and maintained by the United  
119 States Geological Survey (see Appendix S1 in Supporting Information for details). Specifically,

120 we obtained the observed maximum of daily peak flows occurring from October through March  
121 of the first freshwater rearing year, and the minimum of low summer flows occurring from June  
122 through September of the first summer of freshwater rearing.

123         Because conditions experienced by salmon and steelhead during their first year at sea are  
124 thought to be critical to overall survival and growth of a given year class (Beamish & Mahnken  
125 2001), we chose the average North Pacific Gyre Oscillation index (NPGO) from January through  
126 December as an index of conditions experienced by juvenile steelhead during their first year in  
127 the ocean. Variability in the NPGO reflects annual changes in coastal upwelling and ocean  
128 circulation patterns that correlate strongly with primary and secondary production in coastal  
129 ecosystems (Di Lorenzo *et al.* 2008). Furthermore, the NPGO has been recently identified as an  
130 important indicator of early marine survival in other Pacific salmon species (Kilduff *et al.* 2015).  
131 Because most juvenile steelhead from the Skagit River migrate to sea during the spring of their  
132 second year, we lagged the NPGO indicator by two years beyond the birth year to reflect  
133 conditions experienced during the first year at sea.

134         From a management standpoint, we were interested in the possible effect of hatchery-  
135 reared juvenile steelhead on the productivity of wild steelhead. The Washington Department of  
136 Fish and Wildlife operates a “segregated” steelhead hatchery program (*sensu* Moberg *et al.*  
137 2005) that uses broodstock from a non-local source intentionally bred for early spawning, with  
138 the goal of minimizing temporal reproductive overlap with wild fish and hence minimizing gene  
139 flow into the wild population. Over the time series, hatchery fish were typically reared to age-1  
140 and released in the spring (April or May) from multiple locations in the Skagit Basin. We  
141 hypothesized that hatchery fish would have the greatest potential for conspecific ecological  
142 interactions during the time juvenile steelhead are migrating to sea because observations at a

143 juvenile fish trap (river km 27) indicate they overlap in time and space. Therefore, we assumed  
144 that a cohort born in year  $t$  would interact with hatchery fish released in year  $t + 2$ . We used the  
145 total number of juveniles released from the hatchery within a given year as our covariate.

#### 146 INTEGRATED POPULATION MODEL

147 The IPM we describe here expands upon models developed by others (e.g., Su &  
148 Peterman 2012; Fleischman *et al.* 2013; Winship, O'Farrell & Mohr 2014) in that we include the  
149 effects of extrinsic drivers on population dynamics. As with other IPMs, our model comprises  
150 two major components: a process model describing the production of age-specific offspring, and  
151 observation models to account for errors in the estimates of spawning escapement and age  
152 composition. Following other, more traditional analyses of Pacific salmon population dynamics,  
153 our modeling framework also assumes no consistent bias in estimates of adult spawners or age  
154 composition of returning adults.

155 We begin with our process model where the number of offspring born in year  $t$  that  
156 survive to adulthood ( $R_t$ ) equals the product of a nonlinear function of the number of spawning  
157 adults ( $S_t$ ) and a time-varying stochastic error  $\varepsilon_t$ :

$$158 \quad R_t = f(S_t | \boldsymbol{\theta}) e^{\varepsilon_t}. \quad (1)$$

159 Here we consider two different forms for  $f$ : the Ricker model (Ricker 1954) and the Beverton-  
160 Holt model (Beverton & Holt 1957); see Fig. 1 for model forms and descriptions of their  
161 parameters and associated reference points.

162 The process errors ( $\varepsilon_t$ ) are often assumed to be independent draws from a Gaussian  
163 distribution with a mean of zero and an unknown variance. However, the stochastic  
164 environmental drivers that the  $\varepsilon_t$  are meant to represent typically show relatively strong

165 autocorrelation over time. Thus, we compared two different distributional forms for  $\varepsilon_t$  with non-  
166 zero, autocorrelated means. In the first, we assumed that

$$167 \quad \varepsilon_t \sim \text{Normal}(\phi\varepsilon_{t-1}, \sigma_\varepsilon), \quad (2a)$$

$$168 \quad \varepsilon_0 \sim \text{Normal}\left(0, \frac{\sigma_\varepsilon}{1-\phi^2}\right). \quad (2b)$$

169 Second, we considered models where the non-zero means were also a function of the  
170 various environmental drivers important to salmon survival as discussed above. In those models,

$$171 \quad \varepsilon_t \sim \text{Normal}(\mu_t + \phi\varepsilon_{t-1}, \sigma_\varepsilon) \quad (3a)$$

$$172 \quad \mu_t = \sum_{i=1}^K \gamma_i X_{i,t+h_i} \quad (3b)$$

173 Here,  $\gamma_i$  is the effect of covariate  $X_i$  measured at time  $t$  and shifted by an appropriate lag  $h_i$  based  
174 on the life stage that the covariate would affect most strongly. We standardized all covariates to  
175 have zero-mean and unit-variance to facilitate direct comparison of effect sizes.

176 The estimated numbers of fish of age  $a$  returning in year  $t$  ( $N_{a,t}$ ) is then product of the  
177 total number of brood-year recruits in year  $t-a$  from Equation (1) and the proportion of mature  
178 fish from that brood year that returned to spawn at age  $a$  ( $\pi_{a,t-a}$ ), such that

$$179 \quad N_{a,t} = R_{t-a} \pi_{a,t-a}. \quad (4)$$

180 Adult steelhead from the Skagit River return as 3-8 year-olds, and therefore the vector of age-  
181 specific return rates for brood year  $t$  is  $\boldsymbol{\pi}_t = [\pi_3, \pi_4, \pi_5, \pi_6, \pi_7, \pi_8]_t$ , which we modeled as a  
182 hierarchical random effect whereby  $\boldsymbol{\pi}_t \sim \text{Dirichlet}(\boldsymbol{\eta}\tau)$ . The mean vector  $\boldsymbol{\eta}$  is also distributed as a  
183 Dirichlet; the precision parameter  $\tau$  affects each of the elements in  $\boldsymbol{\eta}$  such that large values of  $\tau$   
184 result in  $\boldsymbol{\pi}_t$  very close to  $\boldsymbol{\eta}$  and small values of  $\tau$  lead to much more diffuse  $\boldsymbol{\pi}_t$ .

185 The spawner-recruit models above describe a process based on the true number of  
186 spawners, but our estimates of the numbers of spawning adults necessarily contain some  
187 sampling errors due to incomplete censuses, pre-spawn mortality, etc. Therefore, we assumed

188 that our estimates of escapement, the number of adult fish that “escape the fishery” and  
189 ultimately spawn ( $E_t$ ), are log-normally distributed about the true number of spawners ( $S_t$ ):

$$190 \quad \ln(E_t) \sim \text{Normal}(\ln(S_t), \sigma_s). \quad (5)$$

191 Catches of wild steelhead are closely recorded by state and tribal biologists, and so we  
192 assume the harvest is recorded without error. We then calculate  $S_t$  as the difference between the  
193 estimated total run size ( $N_t$ ) and harvest ( $H_t$ ), where

$$194 \quad S_t = N_t - H_t, \quad (6)$$

195 and  $N_t$  is the sum of  $N_{a,t}$  from Equation (3) over all age classes.

196 We obtained observations of the number of fish in each age class  $a$  in year  $t$  ( $O_{a,t}$ ) from  
197 scale analyses of 10 – 408 adults per year; no scale samples were taken in 1978-1982, 1984, and  
198 2000. These data were assumed to arise from a multinomial process with order  $Y_t$  and proportion  
199 vector  $\mathbf{d}_t$ , such that

$$200 \quad \mathbf{O}_t \sim \text{Multinomial}(Y_t, \mathbf{d}_t). \quad (7)$$

201 The order of the multinomial is simply the sum of the observed numbers of fish across all ages  
202 returning in year  $t$ :

$$203 \quad Y_t = \sum_{a=3}^8 O_{t,a}. \quad (8)$$

204 The proportion vector  $\mathbf{d}_t$  for the multinomial is based on the age-specific, model-derived  
205 estimates of adult returns in year  $t$  ( $N_{a,t}$ ) such that

$$206 \quad d_{a,t} = \frac{N_{a,t}}{\sum_{a=3}^8 N_{a,t}}. \quad (9)$$

207 We used Bayesian inference to estimate all model parameters and the unobserved true  
208 numbers of spawners and offspring over time. We used the freely available **R** software (v3.6, R  
209 Development Core Team 2019) combined with the JAGS software (v4.2.0, Plummer 2003) to  
210 perform Gibbs sampling with 4 parallel chains of  $5 \times 10^5$  iterations. Following a burn-in period of

211  $2.5 \times 10^5$  iterations, we thinned each chain by keeping every 400<sup>th</sup> sample to eliminate any  
212 possible autocorrelation, which resulted in 5000 samples from the posterior distributions. We  
213 assessed convergence and diagnostic statistics via the ‘CODA’ package in **R** (Plummer *et al.*  
214 2006). Specifically, we used visual inspection of trace plots and density plots, and verified that  
215 Gelman and Rubin’s (2017) potential scale reduction factor was less than 1.1, to ensure adequate  
216 chain mixing and parameter convergence. Data support for each model was evaluated using  
217 leave-one-out cross-validation (LOO) based upon Pareto-smoothed importance sampling  
218 (Vehtari, Gelman & Gabry 2017) as implemented in the ‘loo’ package (Vehtari *et al.* 2019). All  
219 of the code and data files necessary to replicate our analyses are available in the online  
220 supporting material and at [https://github.com/mdscheuerell/skagit\\_sthd](https://github.com/mdscheuerell/skagit_sthd).

## 221 **Results**

222 We found the most data support for the Beverton-Holt form of process model, so all of  
223 the following results are based upon it (see Appendix S2 for full model selection results). Our  
224 estimates of the total population size reflect the uncertainty in the estimated numbers of adults  
225 over time, but the median values agreed quite well with the observed data (Fig. 2). As expected,  
226 the 95% credible intervals were widest in 1996 and 1997 when there were no direct estimates of  
227 spawning adults.

228 The population dynamics of steelhead in the Skagit River are currently under density-  
229 dependent regulation, despite their numbers being well below historical censuses, and there is  
230 considerable uncertainty in the relationship between spawning adults and their surviving  
231 offspring (Fig. 3). The median of  $\alpha$  (i.e., the slope of the relationship at the origin) was 6.8  
232 offspring per spawner, but a lack of data at low spawner abundance led to considerable  
233 uncertainty in the estimate (Fig. 3b). The lower 95% credible interval was about 1.5 offspring per



234 spawner, which is still above replacement, while the upper 95% credible interval was 44  
235 offspring per parent. On the other hand, our estimates of carrying capacity ( $K$ ) were much more  
236 precise, with a median of about 7400 adults and 95% credible interval of approximately 6100 to  
237 10 900 adults (Fig. 3c).

238         There were varying effects of the three environmental covariates on population  
239 productivity (Fig. 4). Peak winter flows were negatively related to survival, suggesting high  
240 discharge events may transport juveniles downstream to lower quality habitats, or lead to direct  
241 mortality from channel avulsion or movement of sediment, wood, and other debris. The median  
242 of the posterior distribution was -0.11 (Fig. 4e), which means that a 1 SD increase in flow above  
243 the mean (i.e., from  $\sim 41 \text{ m}^3 \text{ s}^{-1}$  to  $\sim 68 \text{ m}^3 \text{ s}^{-1}$ ) would translate into a 11% decrease in offspring  
244 per parent. Conversely, the effect of low summer flows was positive (Fig. 4f), possibly indicative  
245 of greater rearing habitat (the median estimate was 0.08 with a 95% credible interval of -0.09 to  
246 0.25). The NPGO had a similar effect to summer flow (Fig. 4g), suggesting warmer waters in the  
247 North Pacific are better for steelhead survival (median equals 0.09 with a 95% credible interval  
248 of -0.08 to 0.27).

249         We also found that the number of hatchery juveniles released into the river during the  
250 time that wild juveniles were migrating to sea was negatively related to productivity (Fig. 4h).  
251 The median effect size was -0.20, which means that a 1 SD increase in the number of hatchery  
252 juveniles released (i.e., from 328 000 to 452 000 fish) would, on average, result in a 18%  
253 decrease in survival to adulthood. Notably, hatchery production experienced three distinct phases  
254 over time (Fig. 4d): a low period between brood year 1978 and 1990 (range = 125 000 to 340  
255 000 smolts), an increasing and high period between 1991 and 2005 (range = 314 000 to 584  
256 000), and a decreasing period beginning in 2006 (range = 0 to 240 000 smolts).

257           The remaining, unexplained environmental variance was indeed highly autocorrelated  
258 over time (Fig. 5). The process residuals were generally positive during the late 1970s and early  
259 1980s when the population was growing (Fig. 2), they were near zero during the stable period of  
260 the 1990s, and then largely negative as the population primarily declined through the 2000s.

261           Based on our estimates of biological reference points, Skagit River steelhead appear to be  
262 managed along a rather conservative harvest management perspective. The optimal yield profiles  
263 suggest it would take approximately 2000 to 3000 spawning adults to produce the maximum  
264 sustainable yield (Fig. 6a), but very few years have ever fallen below that throughout the time  
265 period presented here (i.e., the average number of spawning adults has been two to three times  
266 greater). In other words, the realized harvest rates have been kept low enough to insure very little  
267 risk of overfishing (Fig. 6b).

## 268 **Discussion**

269           In territorial species such as steelhead trout, competition for limited resources commonly  
270 results in density dependent growth and survival amongst juveniles (Imre, Grant & Keeley  
271 2004). Our analysis suggests that such effects have scaled up to the entire population level to  
272 govern patterns of steelhead productivity in the Skagit River basin. Importantly, we found strong  
273 evidence for density dependent interactions despite the fact that contemporary population  
274 censuses are well below historical estimates (Gayeski, McMillan & Trotter 2011). Similar results  
275 have been observed in populations of coho salmon *Oncorhynchus kisutch* Walbaum 1792 in  
276 Oregon (Buhle *et al.* 2009) and in populations of Chinook salmon *Oncorhynchus tshawytscha*  
277 Walbaum 1792 in Idaho (Thorson *et al.* 2013). Although we cannot be certain of the exact life-  
278 stage at which density dependent processes occurred, the freshwater juvenile stage seems likely  
279 given the extended duration of freshwater rearing typical for this species. When steelhead

280 populations reach low numbers, the spatial contraction of spawners may exacerbate the effects of  
281 density dependence because their newly emerged offspring do not have the mobility to access  
282 other vacant habitats (Atlas *et al.* 2015). The evidence for density dependence presented here,  
283 combined with the substantial loss of juvenile rearing habitat in the Skagit River basin (Beechie,  
284 Beamer & Wasserman 1994), suggests that habitat restoration efforts, such as reconnecting  
285 floodplain habitats and improving riparian functioning (Beechie, Pess & Roni 2008), may benefit  
286 this population of steelhead.

287         Fluctuating environments can also affect population dynamics through density  
288 independent mechanisms, and anadromous salmon must contend with many different and  
289 unpredictable habitats over their lifespan. Our results indicate that in the freshwater environment,  
290 large flow events during winter negatively affect steelhead productivity. Unfortunately, this may  
291 portend an uncertain future for these fish. In a recent study, Lee *et al.* (2015) estimated that  
292 future climate change in the Skagit River basin would create increased winter flows. These  
293 changes in hydrology will likely result in much greater exposure of steelhead to extreme high  
294 flow events due to their duration, intensity, and timing (Wade *et al.* 2013). Other evidence  
295 already exists that freshwater discharge from Puget Sound rivers has become much more  
296 variable, with notable negative effects on Chinook salmon *Oncorhynchus tshawytscha* Walbaum  
297 1792 (Ward *et al.* 2015). Furthermore, although we found a somewhat weaker relationship  
298 between low summer flow and productivity, extreme low-flow events are projected to occur at a  
299 higher frequency in the future (Lee *et al.* 2015).

300         We found evidence of positive effects of NPGO on survival, which comports with  
301 previous studies that have made rather compelling cases for a strong positive relationship  
302 between the NPGO and salmon survival (Kilduff *et al.* 2015). The NPGO is a synoptic measure

303 of ocean conditions over a large region of the North Pacific Ocean (Kilduff *et al.* 2015), so we  
304 cannot say where and when, exactly, the effects of the ocean environment most manifest  
305 themselves. Recent evidence also indicates that steelhead smolts suffer high mortality during  
306 their relatively brief migration through Puget Sound (Moore *et al.* 2015), possibly due to  
307 predation by marine mammals (Berejikian, Moore & Jeffries 2016). Notably, too, the residual  
308 process errors not captured by our covariates ( $w_t$  in Equation 1) were correlated with the  
309 estimated marine survival of Skagit River hatchery steelhead (median Pearson's correlation  
310 coefficient = 0.29; 95% credible interval = [0.03, 0.50]), suggesting marine processes not  
311 captured by our covariates likely influenced productivity.

312         Among the various mitigation measures to address salmon declines, artificial propagation  
313 of salmon has been used widely for more than a century. Nevertheless, research in other river  
314 systems points to negative ecological effects of hatchery fish on wild Pacific salmon, including  
315 populations coho salmon (Buhle *et al.* 2009), and Chinook salmon (Levin, Zabel & Williams  
316 2001). Our results provide further evidence that large releases of hatchery-reared juvenile  
317 steelhead have had a negative effect on productivity of wild steelhead, although we note some  
318 researchers have used an approach similar to ours and found no hatchery effect on productivity  
319 (Courter *et al.* 2019; Nelson *et al.* 2019). Our study was unable determine the mechanism  
320 responsible for the correlation between hatchery releases and wild steelhead productivity. In fact,  
321 very few empirical studies have been conducted at the appropriate spatial and temporal scales  
322 necessary to directly quantify the hypothesized mechanisms by which negative ecological  
323 interactions between hatchery and wild fish may occur (Weber & Fausch 2003). That said,  
324 however, competition for limiting freshwater food and habitat resources (Berejikian *et al.* 2000)  
325 is a plausible mechanism, either during the relatively brief period of overlap during downstream

326 migration (ca. 2 – 4 weeks), or a more prolonged effect of any hatchery fish that do not migrate  
327 to sea, but instead “residualize” within freshwater. Additionally, predators are known to respond  
328 numerically to their prey, and it is possible that large numbers of hatchery fish attracted  
329 additional predators (Kostow 2009). Although breeding by hatchery individuals that stray onto  
330 natural spawning grounds may reduce the fitness of a wild population via gene flow from the  
331 hatchery stock into the wild population (Araki, Cooper & Blouin 2009), our study only  
332 considered within-cohort effects. Thus, it seems unlikely that a trans-generational genetic effect  
333 was the mechanism for the observed negative association between hatchery releases and wild  
334 productivity.

335         Throughout the Puget Sound region, steelhead have been exposed to varying degrees of  
336 influence by hatchery fish over the past 100 years, but they share the marine rearing  
337 environment, and thus have experienced relatively similar ocean conditions during the same time  
338 period. The marked decreases in abundance observed in many of these populations from the late  
339 1980s to the late 2000’s, including the Skagit, mirrors observations of a general declining trend  
340 in marine survival of hatchery conspecifics across the same time period, suggesting some larger,  
341 unmeasured forces have been at work (Kendall, Marstrom & Klungle 2017). Furthermore, in  
342 response to the declining abundance of wild Skagit River steelhead coupled with declining  
343 marine survival of hatchery steelhead, fisheries managers increased hatchery production to  
344 replace lost fishing opportunities. Thus, it is plausible that declining wild productivity was  
345 simply coincident with higher hatchery production, rather than a consequence of it. It is also  
346 possible that multicollinearity among measured and unmeasured covariates increased the  
347 estimated effect sizes.

348           The life history complexity of steelhead may not lend well to the use of traditional  
349    spawner recruit models such as the forms used in this study. Notably, steelhead exhibit  
350    significant phenotypic plasticity with respect to adopting partial migration strategies, with  
351    unknown proportions of a given cohort adopting a non-anadromous resident life history type  
352    (Kendall *et al.* 2015). Given that only anadromous individuals are included in the annual  
353    derivation of age structured abundance, there may be a large component of each cohort that is  
354    missed which likely resulted in substantial observation error not captured in our models.  
355    Therefore, caution should be used when interpreting the spawner recruit relationships and  
356    resulting management reference points presented here. Furthermore, future research should aim  
357    at quantifying the contribution of individuals adopting the resident life history type to overall  
358    productivity. Without these estimates, accurate assessments of the status of steelhead populations  
359    may not be possible. The “precautionary approach” to fisheries management aims to balance the  
360    trade-off between catch and the risk of over-fishing such that minimizing the risk of overfishing  
361    takes precedence (Hilborn *et al.* 2001). Our Bayesian state-space model provides a formal means  
362    for estimating the probability of fishing in a sustainable manner. We found compelling evidence  
363    that harvest rates for wild steelhead in the Skagit River basin over the time period considered  
364    here have been well below those that would drive the population toward extinction. This result,  
365    combined with the strong indication of density dependence, lends further support to the notion  
366    that habitat improvements may benefit this population most. However, some caution is warranted  
367    because we may have overestimated the biological reference points by not fully accounting for  
368    repeat spawners.

369           Here we have demonstrated how to use incomplete information about the abundance and  
370    age structure of a population to estimate density dependent population dynamics in light of

371 natural and human-induced variability in the environment. Our study adds to the growing body  
372 of evidence that habitat, hatchery practices, and environmental variability are intricately linked in  
373 affecting productivity of wild Pacific salmon stocks. Future research should focus on quantifying  
374 habitat limitation on productivity at specific life stages to better focus restoration actions needed  
375 to recover wild steelhead. Our modeling framework also allowed us to assess the degree to which  
376 hatchery and harvest management actions are likely to affect the long-term viability of the  
377 population. Our results suggest that hatchery program goals for steelhead need to be considered  
378 carefully with respect to recovery goals and the quantity and quality of steelhead habitat. If  
379 releases of non-local origin hatchery steelhead have indeed limited the production potential of  
380 wild steelhead, there are likely significant tradeoffs between providing harvest opportunities via  
381 hatchery steelhead production and achieving wild steelhead recovery goals.

## 382 **Acknowledgements**

383 We thank Eric Buhle and Jim Thorson for helpful discussions about model development. We  
384 also thank Rebecca Bernard, Pete Kairis, Brett Barkdull, Andrew Fowler, and numerous WDFW,  
385 Sauk-Suiattle, Swinomish, and Upper Skagit tribal biologists who compiled the escapement and  
386 age data. Annette Hoffman, Dan Rawding, Kris Ryding, and James Scott provided constructive  
387 criticism. This research was funded in part by a NOAA Fisheries And The Environment (FATE)  
388 grant (#15-01), and an Environmental Protection Agency Tribal Capacity grant (#PA-00J320-  
389 01).

## 390 **Authors' Contributions**

391 MS, CR and JA conceived the ideas and designed methodology; MS and CR analysed the data;  
392 MS and CR led the writing of the manuscript. All authors contributed critically to the drafts and  
393 gave final approval for publication.

394 **Data Accessibility**

395 All of the fish data have been archived at Figshare and are available via the following links:

396 abundance (<https://dx.doi.org/10.6084/m9.figshare.3458183.v1>);

397 age composition (<https://dx.doi.org/10.6084/m9.figshare.3458204.v1>);

398 harvest (<https://dx.doi.org/10.6084/m9.figshare.3458189.v1>); and

399 hatchery releases (<https://dx.doi.org/10.6084/m9.figshare.3457163.v1>).

400 The river flow data are available from the United States Geological Survey National Water

401 Information System (<http://waterdata.usgs.gov/nwis>). The North Pacific Gyre Oscillation data

402 are available from Emanuele Di Lorenzo at Georgia Technical University

403 (<http://www.o3d.org/npgo/>).



404 **REFERENCES**

- 405 Ahrestani, F.S., Saracco, J.F., Sauer, J.R., Pardieck, K.L. & Royle, J.A. (2017) An integrated  
406 population model for bird monitoring in North America. *Ecological Applications*, **27**,  
407 916-924.
- 408 Araki, H., Cooper, B. & Blouin, M.S. (2009) Carry-over effect of captive breeding reduces  
409 reproductive fitness of wild-born descendants in the wild. *Biology Letters*, **5**, 621-624.
- 410 Atlas, W.I., Buehrens, T.W., McCubbing, D.J.F., Bison, R. & Moore, J.W. (2015) Implications  
411 of spatial contraction for density dependence and conservation in a depressed population  
412 of anadromous fish. *Canadian Journal of Fisheries and Aquatic Sciences*, **72**, 1682-1693.
- 413 Beamish, R.J. & Mahnken, C. (2001) A critical size and period hypothesis to explain natural  
414 regulation of salmon abundance and the linkage to climate and climate change. *Progress*  
415 *in Oceanography*, **49**, 423-437.
- 416 Beechie, T., Pess, G. & Roni, P. (2008) Setting river restoration priorities: a review of  
417 approaches and a general protocol for identifying and prioritizing actions. *North*  
418 *American Journal of Fisheries Management*, **28**, 891-905.
- 419 Beechie, T.J., Beamer, E.M. & Wasserman, L. (1994) Estimating coho salmon rearing habitat  
420 and smolt production losses in a large river basin, and implications for habitat restoration.  
421 *North American Journal of Fisheries Management*, **14**, 797-811.
- 422 Berejikian, B.A., Moore, M.E. & Jeffries, S.J. (2016) Predator-prey interactions between harbor  
423 seals and migrating steelhead trout smolts revealed by acoustic telemetry. *Marine*  
424 *Ecology Progress Series*, **543**, 21-35.
- 425 Berejikian, B.A., Tezak, E.P., Flagg, T.A., LaRae, A.L., Kummerow, E. & Mahnken, C.V.W.  
426 (2000) Social dominance, growth, and habitat use of age-0 steelhead (*Oncorhynchus*

- 427 *mykiss*) grown in enriched and conventional hatchery rearing environments. *Canadian*  
428 *Journal of Fisheries and Aquatic Sciences*, **57**, 628-636.
- 429 Beverton, R.J.H. & Holt, S.J. (1957) *On the Dynamics of Exploited Fish Populations*. Fishery  
430 Investigations Series II Volume XIX, Ministry of Agriculture, Fisheries and Food,  
431 London.
- 432 Buhle, E.R., Holsman, K.K., Scheuerell, M.D. & Albaugh, A. (2009) Using an unplanned  
433 experiment to evaluate the effects of hatcheries and environmental variation on  
434 threatened populations of wild salmon. *Biological Conservation*, **142**, 2449-2455.
- 435 Buhle, E.R., Scheuerell, M.D., Cooney, T.D., Ford, M.J., Zabel, R.W. & Thorson, J.T. (2018)  
436 *Using Integrated Population Models to Evaluate Fishery and Environmental Impacts on*  
437 *Pacific Salmon Viability*. U.S. Department of Commerce, NOAA Technical  
438 Memorandum NMFS-NWFSC-140.
- 439 Courter, II, Wyatt, G.J., Perry, R.W., Plumb, J.M., Carpenter, F.M., Ackerman, N.K., Lessard,  
440 R.B. & Galbreath, P.F. (2019) A Natural-Origin Steelhead Population's Response to  
441 Exclusion of Hatchery Fish. *Transactions of the American Fisheries Society*, **148**, 339-  
442 351.
- 443 Crawford, B.A., Moore, C.T., Norton, T.M. & Maerz, J.C. (2018) Integrated analysis for  
444 population estimation, management impact evaluation, and decision-making for a  
445 declining species. *Biological Conservation*, **222**, 33-43.
- 446 Crozier, L.G., Zabel, R.W., Hockersmith, E.E. & Achord, S. (2010) Interacting effects of density  
447 and temperature on body size in multiple populations of Chinook salmon. *Journal of*  
448 *Animal Ecology*, **79**, 342-349.

- 449 Di Lorenzo, E., Schneider, N., Cobb, K.M., Franks, P.J.S., Chhak, K., Miller, A.J., McWilliams,  
450 J.C., Bograd, S.J., Arango, H., Curchitser, E., Powell, T.M. & Riviere, P. (2008) North  
451 Pacific Gyre Oscillation links ocean climate and ecosystem change. *Geophysical*  
452 *Research Letters*, **35**, 6.
- 453 Eacker, D.R., Lukacs, P.M., Proffitt, K.M. & Hebblewhite, M. (2017) Assessing the importance  
454 of demographic parameters for population dynamics using Bayesian integrated  
455 population modeling. *Ecological Applications*, **27**, 1280-1293.
- 456 Fleischman, S.J., Catalano, M.J., Clark, R.A. & Bernard, D.R. (2013) An age-structured state-  
457 space stock-recruit model for Pacific salmon (*Oncorhynchus* spp.). *Canadian Journal of*  
458 *Fisheries and Aquatic Sciences*, **70**, 401-414.
- 459 Gayeski, N., McMillan, B. & Trotter, P. (2011) Historical abundance of Puget Sound steelhead,  
460 *Oncorhynchus mykiss*, estimated from catch record data. *Canadian Journal of Fisheries*  
461 *and Aquatic Sciences*, **68**, 498-510.
- 462 Hard, J.J., Myers, J.M., Connor, E.J., Hayman, R.A., Kope, R.G., Lucchetti, G., Marshall, A.R.,  
463 Pess, G.R. & Thompson, B.E. (2015) *Viability Criteria for Steelhead within the Puget*  
464 *Sound Distinct Population Segment*. U.S. Dept. Commerce, NOAA Tech. Memo. NMFS-  
465 NWFSC-129., Springfield, VA.
- 466 Hilborn, R., Maguire, J.J., Parma, A.M. & Rosenberg, A.A. (2001) The Precautionary Approach  
467 and risk management: can they increase the probability of successes in fishery  
468 management? *Canadian Journal of Fisheries and Aquatic Sciences*, **58**, 99-107.
- 469 Imre, I., Grant, J.W.A. & Keeley, E.R. (2004) The effect of food abundance on territory size and  
470 population density of juvenile steelhead trout (*Oncorhynchus mykiss*). *Oecologia*, **138**,  
471 371-378.

- 472 Irvine, J.R. (1986) Effects of varying discharge on the downstream movement of salmon fry,  
473 *Oncorhynchus tshawytscha* Walbaum. *Journal of Fish Biology*, **28**, 17-28.
- 474 Kendall, N.W., Marstrom, G.W. & Klungle, M.M. (2017) Declining patterns of Pacific  
475 Northwest steelhead trout (*Oncorhynchus mykiss*) adult abundance and smolt survival in  
476 the ocean. *Canadian Journal of Fisheries and Aquatic Sciences*, **74**, 1275-1290.
- 477 Kendall, N.W., McMillan, J.R., Sloat, M.R., Buehrens, T.W., Quinn, T.P., Pess, G.R.,  
478 Kuzishchin, K.V., McClure, M.M. & Zabel, R.W. (2015) Anadromy and residency in  
479 steelhead and rainbow trout (*Oncorhynchus mykiss*): a review of the processes and  
480 patterns. *Canadian Journal of Fisheries and Aquatic Sciences*, **72**, 319-342.
- 481 Kilduff, D.P., Di Lorenzo, E., Botsford, L.W. & Teo, S.L.H. (2015) Changing central Pacific El  
482 Niños reduce stability of North American salmon survival rates. *Proceedings of the*  
483 *National Academy of Sciences*.
- 484 Knape, J. & de Valpine, P. (2012) Are patterns of density dependence in the Global Population  
485 Dynamics Database driven by uncertainty about population abundance? *Ecology Letters*,  
486 **15**, 17-23.
- 487 Kostow, K. (2009) Factors that contribute to the ecological risks of salmon and steelhead  
488 hatchery programs and some mitigating strategies. *Reviews in Fish Biology and*  
489 *Fisheries*, **19**, 9-31.
- 490 Lebreton, J.D. & Gimenez, O. (2013) Detecting and estimating density dependence in wildlife  
491 populations. *Journal of Wildlife Management*, **77**, 12-23.
- 492 Lee, A.M., Bjorkvoll, E.M., Hansen, B.B., Albon, S.D., Stien, A., Saether, B.E., Engen, S.,  
493 Veiberg, V., Loe, L.E. & Grotan, V. (2015) An integrated population model for a long-  
494 lived ungulate: more efficient data use with Bayesian methods. *Oikos*, **124**, 806-816.

- 495 Levin, P.S., Zabel, R.W. & Williams, J.G. (2001) The road to extinction is paved with good  
496 intentions: negative association of fish hatcheries with threatened salmon. *Proceedings of*  
497 *the Royal Society of London B Biological Sciences*, **268**, 1153-1158.
- 498 Maunder, M.N. & Punt, A.E. (2013) A review of integrated analysis in fisheries stock  
499 assessment. *Fisheries Research*, **142**, 61-74.
- 500 Mobrand, L.E., Barr, J., Blankenship, L., Campton, D.E., Evelyn, T.T.P., Flagg, T.A., Mahnken,  
501 C.V.W., Seeb, L.W., Seidel, P.R., Smoker, W.W. & Hatchery Sci Rev, G. (2005)  
502 Hatchery reform in Washington state: Principles and emerging issues. *Fisheries*, **30**, 11-  
503 23.
- 504 Moore, M.E., Berejikian, B.A., Goetz, F.A., Berger, A.G., Hodgson, S.S., Connor, E.J. & Quinn,  
505 T.P. (2015) Multi-population analysis of Puget Sound steelhead survival and migration  
506 behavior. *Marine Ecology Progress Series*, **537**, 217-232.
- 507 Nelson, B.W., Walters, C.J., Trites, A.W. & McAllister, M.K. (2019) Wild Chinook salmon  
508 productivity is negatively related to seal density and not related to hatchery releases in the  
509 Pacific Northwest. *Canadian Journal of Fisheries and Aquatic Sciences*, **76**, 447-462.
- 510 Plummer, M. (2003) JAGS: A program for analysis of Bayesian graphical models using Gibbs  
511 sampling. *Proceedings of the 3rd International Workshop on Distributed Statistical*  
512 *Computing*. Vienna, Austria.
- 513 Plummer, M., Best, N., Cowles, K. & Vines, K. (2006) CODA: Convergence Diagnosis and  
514 Output Analysis for MCMC. *R News*, **6**, 7-11.
- 515 R Development Core Team (2019) R: A Language and Environment for Statistical Computing. R  
516 Foundation for Statistical Computing, Vienna, Austria.

- 517 Regehr, E.V., Hostetter, N.J., Wilson, R.R., Rode, K.D., St Martin, M. & Converse, S.J. (2018)  
518 Integrated population modeling provides the first empirical estimates of vital rates and  
519 abundance for polar bears in the Chukchi Sea. *Scientific Reports*, **8**.
- 520 Ricker, W.E. (1954) Stock and recruitment. *Journal of the Fisheries Research Board of Canada*,  
521 **11**, 559-623.
- 522 Ruckelshaus, M.H., Levin, P., Johnson, J.B. & Kareiva, P.M. (2002) The Pacific salmon wars:  
523 what science brings to the challenge of recovering species. *Annual Review of Ecology*  
524 *and Systematics*, **33**, 665-706.
- 525 Sanz-Aguilar, A., Manuel Igual, J., Oro, D., Genovart, M. & Tavecchia, G. (2016) Estimating  
526 recruitment and survival in partially monitored populations. *Journal of Applied Ecology*,  
527 **53**, 73-82.
- 528 Saunders, S.P., Cuthbert, F.J. & Zipkin, E.F. (2018) Evaluating population viability and efficacy  
529 of conservation management using integrated population models. *Journal of Applied*  
530 *Ecology*, **55**, 1380-1392.
- 531 Schaub, M. & Abadi, F. (2011) Integrated population models: a novel analysis framework for  
532 deeper insights into population dynamics. *Journal of Ornithology*, **152**, 227-237.
- 533 Scheuerell, M.D. (2016) An explicit solution for calculating optimum spawning stock size from  
534 Ricker's stock recruitment model. *Peerj*, **4**, e1623.
- 535 Scheuerell, M.D., Hilborn, R., Ruckelshaus, M.H., Bartz, K.K., Lagueux, K., Haas, A. &  
536 Rawson, K. (2006) The Shiraz model: a tool for incorporating anthropogenic effects and  
537 fish-habitat relationships in conservation planning. *Canadian Journal of Fisheries and*  
538 *Aquatic Sciences*, **63**, 1596–1607.

- 539 Schindler, D.E. & Hilborn, R. (2015) Prediction, precaution, and policy under global change.  
540 *Science*, **347**, 953-954.
- 541 Su, Z.M. & Peterman, R.M. (2012) Performance of a Bayesian state-space model of semelparous  
542 species for stock-recruitment data subject to measurement error. *Ecological Modelling*,  
543 **224**, 76-89.
- 544 Thorson, J.T., Scheuerell, M.D., Buhle, E.R. & Copeland, T. (2013) Spatial diversity buffers  
545 temporal variability in early juvenile survival for an endangered Pacific salmon. *Journal*  
546 *of Animal Ecology*, **83**, 157-167.
- 547 Thorson, J.T., Skaug, H.J., Kristensen, K., Shelton, A.O., Ward, E.J., Harms, J.H. & Benante,  
548 J.A. (2015) The importance of spatial models for estimating the strength of density  
549 dependence. *Ecology*, **96**, 1202-1212.
- 550 Vehtari, A., Gabry, J., Yao, Y. & Gelman, A. (2019) loo: Efficient leave-one-out cross-  
551 validation and WAIC for Bayesian models. R package version 2.1.0.
- 552 Vehtari, A., Gelman, A. & Gabry, J. (2017) Practical Bayesian model evaluation using leave-  
553 one-out cross-validation and WAIC. *Statistics and Computing*, **27**, 1413-1432.
- 554 Wade, A.A., Beechie, T.J., Fleishman, E., Mantua, N.J., Wu, H., Kimball, J.S., Stoms, D.M. &  
555 Stanford, J.A. (2013) Steelhead vulnerability to climate change in the Pacific Northwest.  
556 *Journal of Applied Ecology*, **50**, 1093-1104.
- 557 Waples, R.S. (1991) Pacific salmon, *Oncorhynchus* spp., and the definition of "species" under  
558 the Endangered Species Act. *US National Marine Fisheries Service Marine Fisheries*  
559 *Review*, **53**, 11-22.

- 560 Ward, E.J., Anderson, J.H., Beechie, T.J., Pess, G.R. & Ford, M.J. (2015) Increasing hydrologic  
561 variability threatens depleted anadromous fish populations. *Global Change Biology*, **21**,  
562 2500-2509.
- 563 Ward, E.J., Holmes, E.E., Thorson, J.T. & Collen, B. (2014) Complexity is costly: a meta-  
564 analysis of parametric and non-parametric methods for short-term population forecasting.  
565 *Oikos*, **123**, 652-661.
- 566 Weber, E.D. & Fausch, K.D. (2003) Interactions between hatchery and wild salmonids in  
567 streams: differences in biology and evidence for competition. *Canadian Journal of*  
568 *Fisheries and Aquatic Sciences*, **60**, 1018-1036.
- 569 Winship, A.J., O'Farrell, M.R. & Mohr, M.S. (2014) Fishery and hatchery effects on an  
570 endangered salmon population with low productivity. *Transactions of the American*  
571 *Fisheries Society*, **143**, 957-971.
- 572 Yen, J.D.L., Tonkin, Z., Lyon, J., Koster, W., Kitchingman, A., Stamation, K. & Vesk, P.A.  
573 (2019) Integrating Multiple Data Types to Connect Ecological Theory and Data Among  
574 Levels. *Frontiers in Ecology and Evolution*, **7**.
- 575 Zabel, R.W. & Levin, P.S. (2002) Simple assumptions on age composition lead to erroneous  
576 conclusions on the nature of density dependence in age-structured populations.  
577 *Oecologia*, **133**, 349-355.
- 578 Zabel, R.W., Scheuerell, M.D., McClure, M.M. & Williams, J.G. (2006) The interplay between  
579 climate variability and density dependence in the population viability of Chinook salmon.  
580 *Conservation Biology*, **20**, 190-200.
- 581 Zipkin, E.F. & Saunders, S.P. (2018) Synthesizing multiple data types for biological  
582 conservation using integrated population models. *Biological Conservation*, **217**, 240-250.



## FIGURES

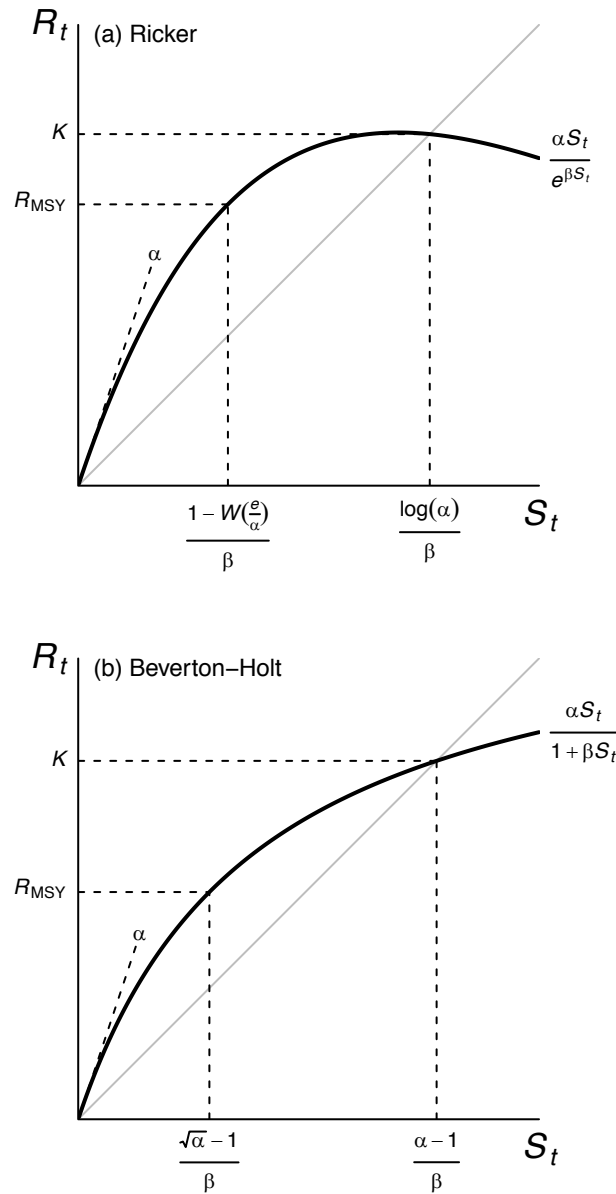

**Figure 1.** Deterministic forms of the (a) Ricker and (b) Beverton-Holt models used in the analyses (thick lines), including equations for carrying capacity ( $K$ ) and the number of recruits corresponding to the maximum sustained yield ( $R_{MSY}$ ). The parameter  $\alpha$  defines the slope at the origin, the constant  $e$  is Euler's number, and  $W(\cdot)$  is the Lambert function (see Scheuerell 2016 for details). The gray line is where  $R_t = S_t$ .

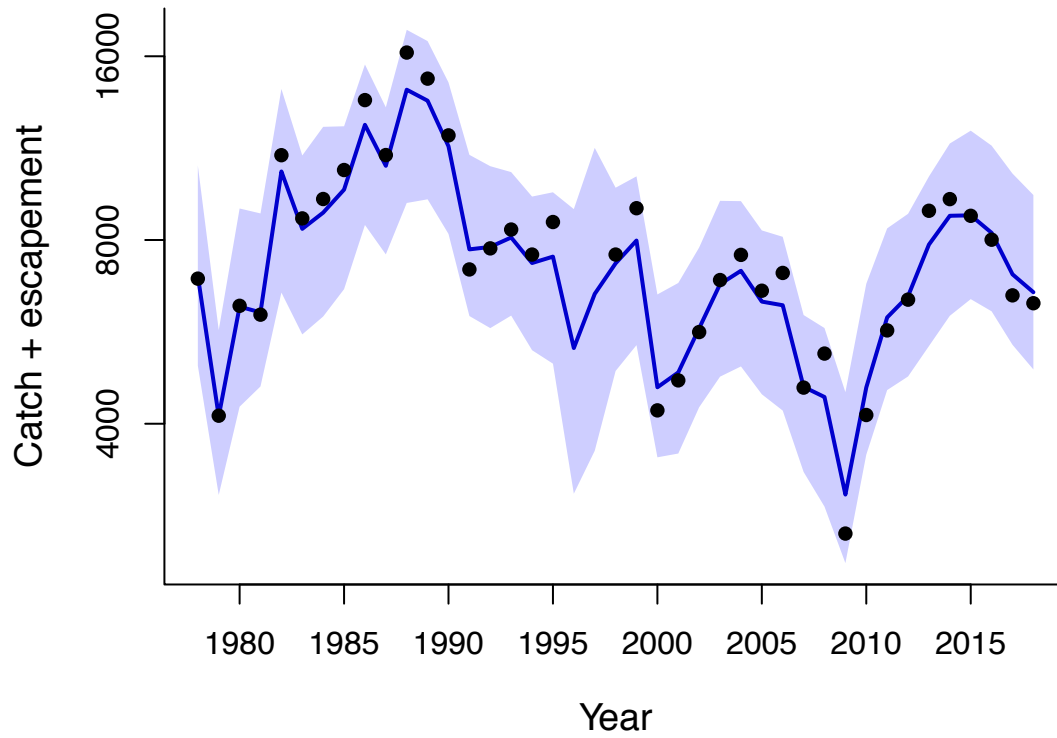

**Figure 2.** Time series of the estimated total population size (catch plus the adults that escaped to spawn). The observed data are the points; the solid line is the median estimate and the shaded region indicates the 95% credible interval.

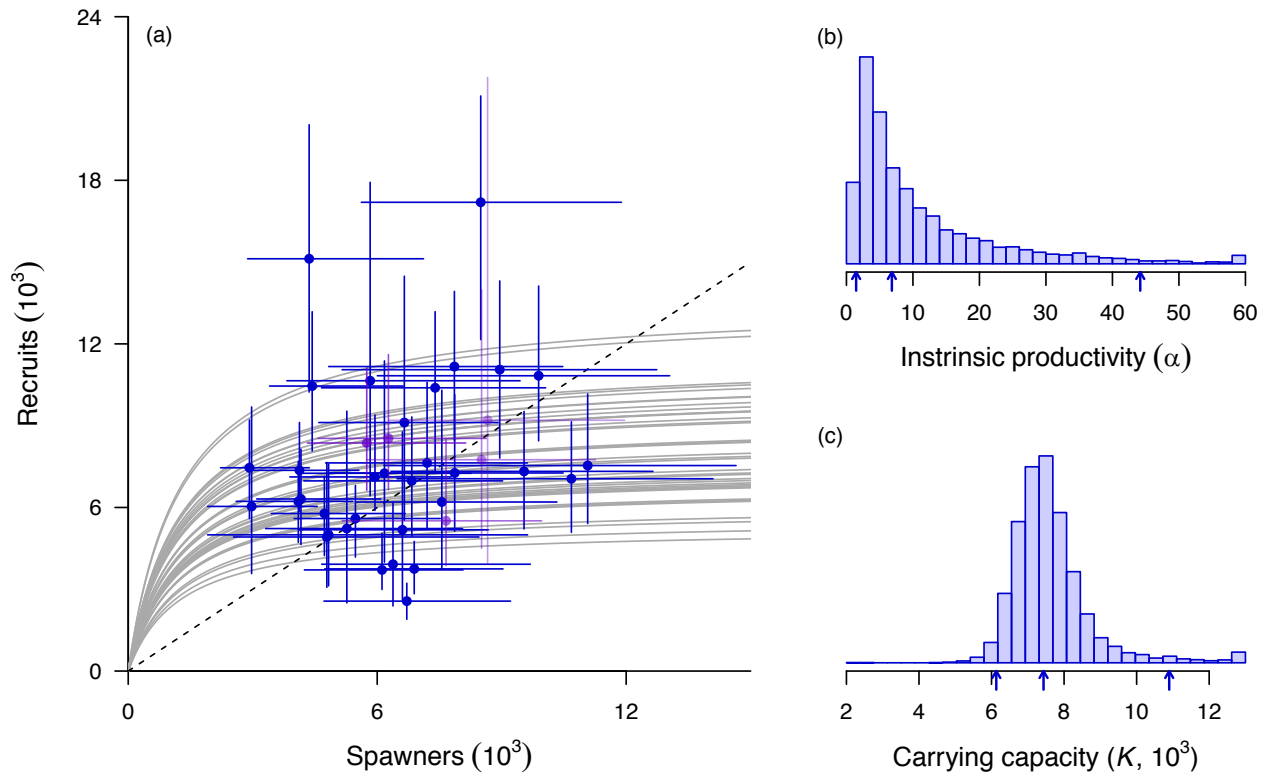

**Figure 3.** Relationship between the number of spawning adults and their subsequent surviving offspring (recruits), assuming mean values for all covariates (a); and the estimated posterior distributions for the intrinsic productivity (b) and carrying capacity (c). Points in (a) are medians of the posterior estimates; error bars indicate the 95% credible intervals. Blue points are for estimates with complete broods; purple points are for the most recent years with incomplete broods. Gray lines show the median relationship for each of the 41 years in the time series based on annual model estimates of productivity. Note that for plotting purposes only in (b) and (c), the density in the largest bin for each parameter contains counts for all values greater than or equal to it. Vertical arrows under the x-axes in (b) and (c) indicate the 2.5<sup>th</sup>, 50<sup>th</sup>, and 97.5<sup>th</sup> percentiles.

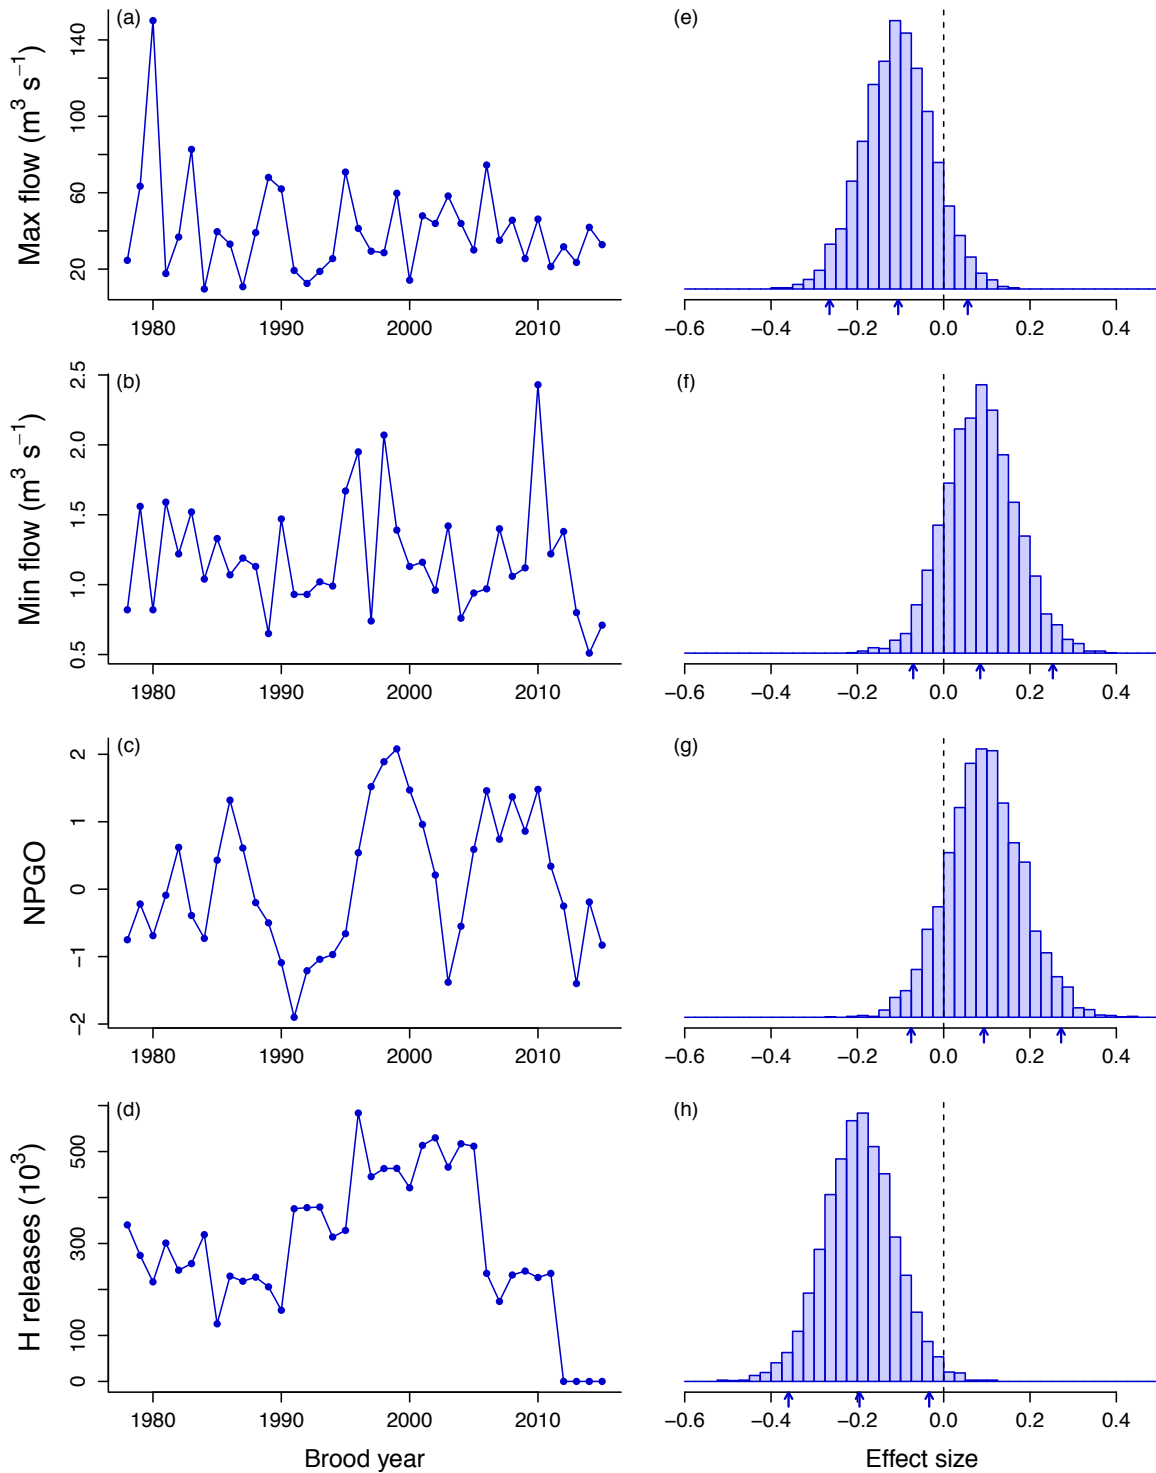

**Figure 4.** Time series of the environmental covariates used in the model (a-d), and their standardized effects on population productivity (e-g). Small arrows under histograms denote the 2.5<sup>th</sup>, 50<sup>th</sup>, and 97.5<sup>th</sup> percentiles of the posterior distribution.

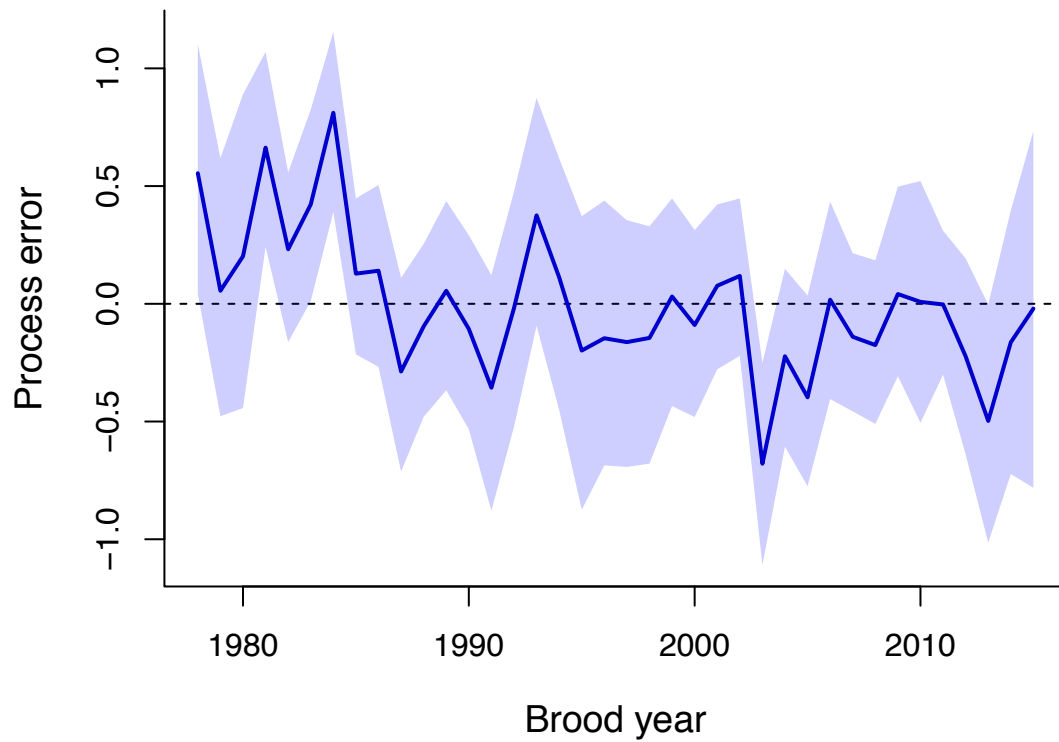

**Figure 5.** Time series of the estimated process errors, which represent the population's productivity after accounting for the effects of density dependence and environmental covariates. The solid line is the median estimate and the shaded region indicates the 95% credible interval.

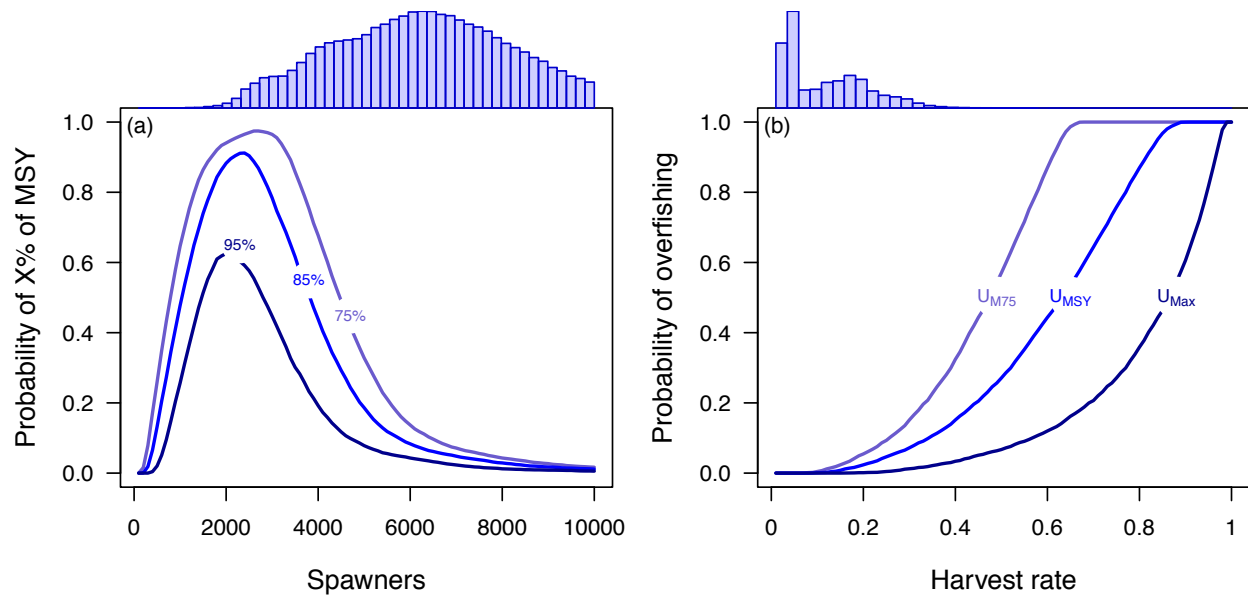

**Figure 6.** Plots of (a) the probability that a given number of spawners produces average yields achieving 95%, 85%, or 75% of the estimated maximum sustainable yield (MSY); and (b) the cumulative probability of overfishing the population, based on harvest rates equal to those at 75% of MSY, at MSY, and at the maximum per recruit. The histograms above (a) and (b) are distributions of the posterior estimates for the number of spawners and harvest rates, respectively; the histogram in (a) has been truncated at  $10^4$ .

## **SUPPORTING INFORMATION**

Additional Supporting Information may be found in the online version of this article:

**Appendix S1.** Instructions for retrieving and archiving the environmental covariates.

**Appendix S2.** Model definitions, model fitting, and model evaluation.

**Appendix S3.** Steps to recreate figures from main text.
